# Supplementary material
Source: PubMed Central journal article supplement (PMC4623856)

A. Sample

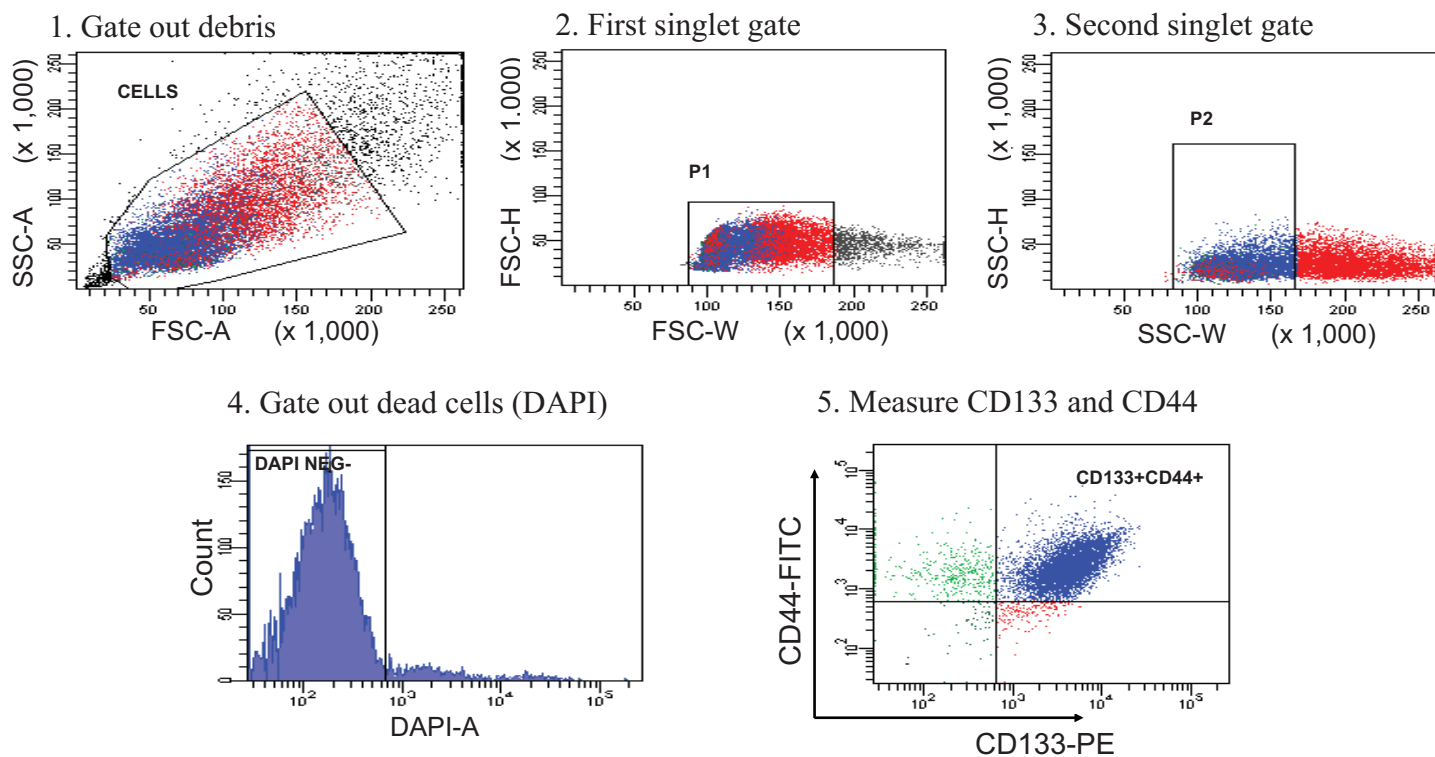

B. Isotype controls

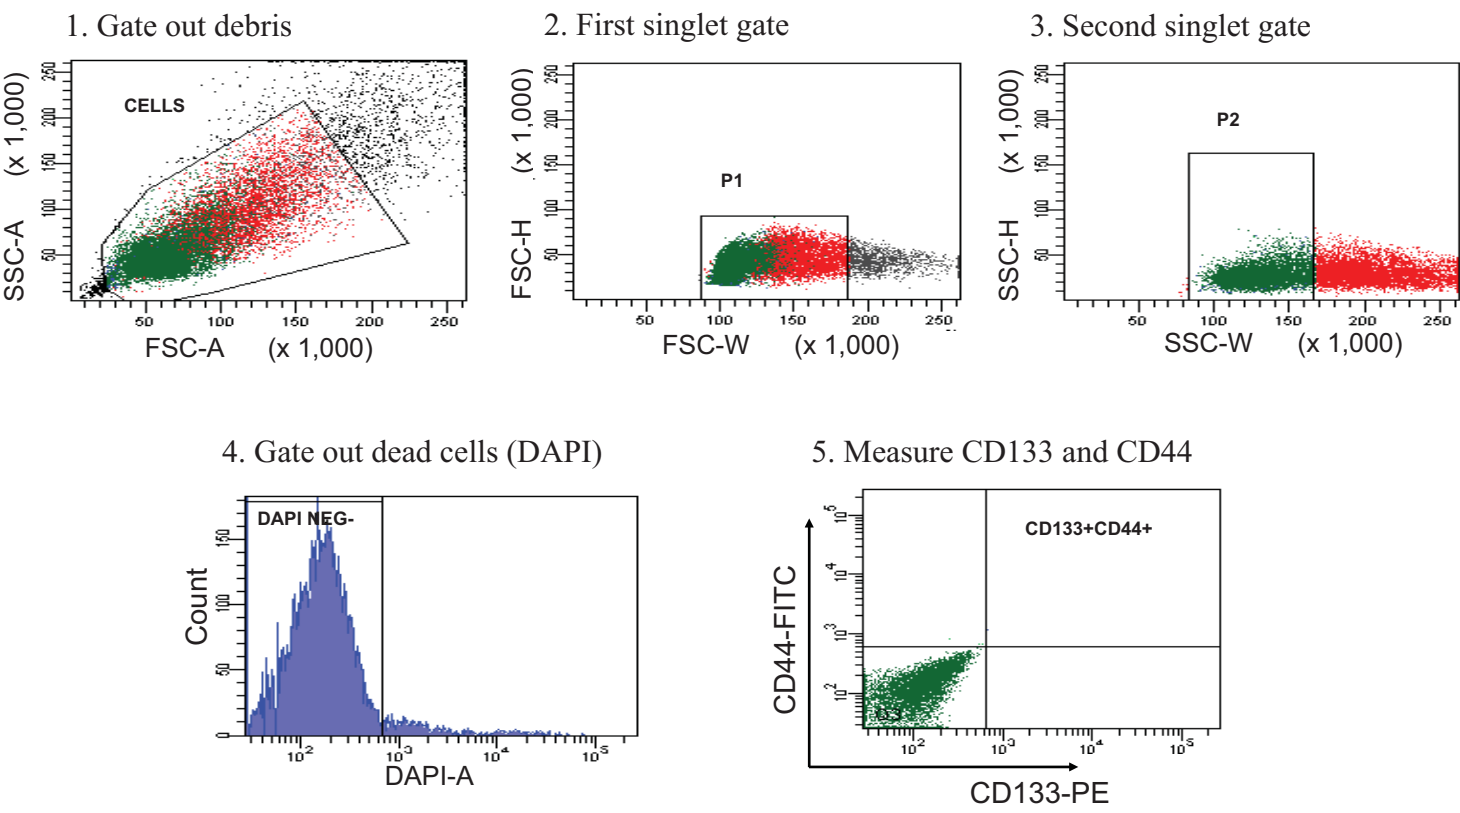

Supplement: 12263_2015_499_MOESM2_ESM.pdf [file 12263_2015_499_MOESM2_ESM.pdf]
